# Supplementary material for: Usefulness of mobile apps for achieving sustainable diving tourism
Source: Research Square preprint supplement (doi:10.21203/rs.3.rs-2621653/v1), 2023-03-02
Supplement: Supplementary file 1 [file 70b17de0026eacf766ec244d.docx]

Table 5. Evidence of discriminant validity of sample B

| HTMT ratio criterion |
| --- |
| Constructs **PUM AGM GCA MLD ERUB SC INST ENV EC** |
| PUM |
| AGM 0.2963 |
| GCA 0.2270 0.6813 |
| MLD 0.5973 0.3624 0.3609 |
| ERUB 0.3638 0.0752 0.2642 0.4322 |
| SC 0.4429 0.3163 0.5063 0.4866 0.5893 |
| INST 0.4525 0.3701 0.5846 0.4489 0.5277 0.8243 |
| ENV 0.4399 0.3116 0.4738 0.4333 0.5995 0.7642 0.8241 |
| EC 0.4513 0.1834 0.3560 0.3830 0.6062 0.8106 0.7012 0.7852 |
| Fornell and Larcker Criterion |
| Constructs **PUM AGM GCA MLD ERUB SC INST ENV EC** |
| PUM  **0.9183** |
| AGM0.0789 **0.7495** |
| GCA0.0440 0.3646 **0.7128** |
| MLD0.3174 0.1123 0.1065 **0.7660** |
| ERUB 0.1145 0.0053 0.0564 0.1548 **0.6252** |
| SC 0.1713 0.0822 0.2017 0.1989 0.2847 **0.6211** |
| INST0.1619 0.1090 0.2482 0.1544 0.2040 0.5041 **0.6615** |
| ENV 0.1506 0.0761 0.1621 0.1439 0.2595 0.4338 0.4504 **0.7231** |
| EC0.1796 0.0300 0.1044 0.1257 0.3013 0.5560 0.3751 0.4565 **0.7184** |

*Note.* PUM=perceived usefulness of mobile apps, AGM=awareness of green marketing, GCA=green competitive advantage, MLD=mobile learning, ERUB=environmentally responsible underwater behavior, SC=socio-cultural dimension of sustainable diving tourism, INST implies the institutional dimension of sustainable diving tourism, ENV=the environmental dimension of sustainable diving tourism, and EC=economic dimension of sustainable diving tourism.

*Source: Authors’ elaboration.*
