# Supplementary material for: Usefulness of mobile apps for achieving sustainable diving tourism
Source: Research Square preprint supplement (doi:10.21203/rs.3.rs-2621653/v1), 2023-03-02
Supplement: Supplementary file 2 [file 7465ee694fb6c93a14f0b2f6.docx]

Table 4. Evidence of discriminant validity of sample A

| HTMT ratio criterion |
| --- |
| Constructs **PUM AGM GCA MLD ERUB SC INST ENV EC** |
| PUM |
| AGM 0.0491 |
| GCA 0.1644 0.5691 |
| MLD 0.4498 0.1717 0.3674 |
| ERUB 0.3125 0.0044 0.2626 0.3108 |
| SC 0.3431 0.1305 0.2958 0.2155 0.3600 |
| INST 0.3216 0.1020 0.5060 0.4706 0.4140 0.3857 |
| ENV 0.3825 0.1267 0.4129 0.3759 0.7156 0.4989 0.7962 |
| EC 0.4113 0.0017 0.3558 0.3833 0.6114 0.6386 0.6663 0.7779 |
| Fornell and Larcker Criterion |
| Constructs **PUM AGM GCA MLD ERUB SC INST ENV EC** |
| PUM **0.9158** |
| AGM0.0052 **0.6583** |
| GCA0.0229 0.2713 **0.7105** |
| MLD0.1843 0.0324 0.1023 **0.7379** |
| ERUB0.0831 0.0029 0.0564 0.0812 **0.6558** |
| SC0.1019 0.0196 0.0664 0.0417 0.1223 **0.6720** |
| INST 0.0905 0.0143 0.1906 0.1739 0.1342 0.1080 **0.6283** |
| ENV 0.1005 0.0177 0.1078 0.0976 0.3383 0.1740 0.3773 **0.6473** |
| EC 0.1490 0.0012 0.0958 0.1208 0.3242 0.3528 0.3204 0.4099 **0.6812** |

*Note.* PUM=perceived usefulness of mobile apps, AGM=awareness of green marketing, GCA=green competitive advantage, MLD=mobile learning, ERUB=environmentally responsible underwater behavior, SC=socio-cultural dimension of sustainable diving tourism, INST=the institutional dimension of sustainable diving tourism, ENV=environmental dimension of sustainable diving tourism, and EC=the economic dimension of sustainable diving tourism.

*Source: Authors’ elaboration.*
