# Supplementary material for: Usefulness of mobile apps for achieving sustainable diving tourism
Source: Research Square preprint supplement (doi:10.21203/rs.3.rs-2621653/v1), 2023-03-02
Supplement: Supplementary file 3 [file 75ad92627385590a12c3e2b4.docx]

Table 1. Demographic information

| Characteristics (sample A, N=145) Frequency Percent (%) |
| --- |
| Age |
| Under 18 25 17.2 |
| 18 – 27 36 24.8 |
| 28 – 37 44 30.3 |
| 38 – 47 33 22.8 |
| 48 – 57 07 04.8 |
| 58 and above - - |
| Gender |
| Male 109 73.1 |
| Female 39 26.9 |
| Marital Status |
| Single or divorced 82 56.6 |
| Married 63 43.4 |
| Education Level |
| Secondary school - - |
| High school 18 12.4 |
| Two-year university degree 04 02.8 |
| Four-year university degree 81 55.9 |
| Graduate degree 42 29.0 |
|  |
| Location |
| Famagusta 33 22.8 |
| Kyrenia 50 34.5 |
| Nicosia (north) 35 24.1 |
| Nicosia (south) 02 1.4 |
| Trikomo 25 17.2 |
| Dive experience |
| 1 – 20 dives 21 14.5 |
| 20 – 60 dives 23 15.9 |
| 60 – 100 dives 25 17.2 |
| More than 100 dives 76 52.4 |
| CMAS (Confédération Mondiale des Activités Subaquatiques) |
| Introductory Scuba Experience 12 8.3 |
| CMAS 1* 13 9.0 |
| CMAS 2* 08 5.5 |
| CMAS 3* 17 11.7 |
| CMAS Technical Diver 1 0.7 |
| CMAS 1* instructor level and above 94 64.8 |
| PADI (Professional Association of Diving Instructors) |
| PADI Discover Scuba Diving 2 1.4 |
| PADI Open Water Diver 8 5.5 |
| PADI Advanced Open Water Diver 25 17.2 |
| PADI Rescue Diver 25 17.2 |
| PADI Master Scuba Diver 3 9.7 |
| PADI TecRec Diver - - |
| PADI Divemaster 14 9.7 |
| PADI Assistant instructor 4 2.8 |
| PADI Open Water Scuba Instructor level and above 64 44.1 |
| SSI (Scuba Schools International) |
| SSI Try Scuba Diving 3 2.1 |
| SSI Open Water Diver 9 6.2 |
| SSI Advanced Water Diver 3 2.1 |
| SSI Diver Stress and Rescue 5 3.4 |
| SSI Master Diver  7 4.8 |
| SSI Technical Diver - - |
| SSI Divemaster 5 3.4 |
| SSI Dive guide 3 2.1 |
| SSI Training Specialist 1 0.7 |
| SSI Open Water Instructor level and above 109 75.2 |
| SDI (Scuba Diving International) |
| SDI Scuba Discovery 5 3.4 |
| SDI Open Water Scuba Diver 2 1.4 |
| SDI Advanced Adventure Diver 2 1.4 |
| SDI Rescue Diver 4 2.8 |
| SDI Master Scuba Diver - - |
| SDI Divemaster 2 1.4 |
| SDI Assistant Instructor - - |
| SDI Instructor level and above 130 89.7 |
| BSAC (British Sub-Aqua Club) |
| Ocean Diver 3 2.1 |
| Sports Diver 5 3.4 |
| Dive Leader - - |
| Advanced Diver 2 1.4 |
| First Class Diver 4 2.8 |
| Assistant Diving Instructor 1 0.7 |
| Theory Instructor - - |
| Assistant Open Water Instructor 2 1.4 |
| Practical Instructor 5 3.4 |
| Open Water Instructor level and above 123 84.5 |
| Characteristics (sample B, N=234) Frequency Percent (%) |
| Age |
| Under 18 24 10.3 |
| 18 – 27 65 27.8 |
| 28 – 37 71 30.3 |
| 38 – 47 59 25.2 |
| 48 – 57 15 6.2 |
|  |
| Gender |
| Male 178 76.1  Female 56 23.9 |
|  |
| Marital Status |
| Single or divorced 104 44.4 |
| Married 130 55.6 |
| Education Level |
| Primary school - - |
| Secondary school 1 0.4 |
| High school 27 11.5 |
| Two-year university degree 32 13.7 |
| Four-year university degree 119 50.9 |
| Graduate degree 55 23.5 |
| 25 17.2 |
| Dive experience |
| 1 – 20 dives 23 9.8 |
| 20 – 60 dives 34 14.5 |
| 60 – 100 dives 24 10.3 |
| More than 100 dives 153 65.4 |
| CMAS (Confédération Mondiale des Activités Subaquatiques) |
| Introductory Scuba Experience 7 3.0 |
| CMAS 1* 22 9.4 |
| CMAS 2* 58 24.8 |
| CMAS 3* 64 27.4 |
| CMAS Technical Diver 1 0.4 |
| CMAS 1* instructor level and above 82 35.0 |
| PADI (Professional Association of Diving Instructors) |
| PADI Discover Scuba Diving 9 3.8 |
| PADI Open Water Diver 13 5.6 |
| PADI Advanced Open Water Diver 11 4.7 |
| PADI Rescue Diver 2 0.9 |
| PADI Master Scuba Diver 5 2.1 |
| PADI TecRec Diver 1 0.4 |
| PADI Divemaster 12 5.1 |
| PADI Assistant instructor 2 0.9 |
| PADI Open Water Scuba Instructor level and above 179 76.5 |
| SSI (Scuba Schools International) |
| SSI Try Scuba Diving 6 2.6 |
| SSI Open Water Diver 14 6.0 |
| SSI Advanced Water Diver 10 4.3 |
| SSI Diver Stress and Rescue - - |
| SSI Master Diver  8 3.4 |
| SSI Technical Diver 1 0.4 |
| SSI Divemaster 11 4.7 |
| SSI Dive guide 4 1.7 |
| SSI Training Specialist 2 0.9 |
| SSI Open Water Instructor level and above 178 76.1 |
| SDI (Scuba Diving International) |
| SDI Scuba Discovery 4 1.7 |
| SDI Open Water Scuba Diver 8 3.4 |
| SDI Advanced Adventure Diver 6 2.6 |
| SDI Rescue Diver 2 0.9 |
| SDI Master Scuba Diver 5 2.1 |
| SDI Divemaster 7 3 |
| SDI Assistant Instructor - - |
| SDI Instructor level and above 202 86.3 |
| BSAC (British Sub-Aqua Club) |
| Ocean Diver 4 1.7 |
| Sports Diver 10 4.3 |
| Dive Leader 3 1.3 |
| Advanced Diver 4 1.7 |
| First Class Diver 3 1.3 |
| Assistant Diving Instructor 6 2.6 |
| Theory Instructor 1 0.4 |
| Assistant Open Water Instructor - - |
| Practical Instructor 1 0.4 |
