# Supplementary material for: Usefulness of mobile apps for achieving sustainable diving tourism
Source: Research Square preprint supplement (doi:10.21203/rs.3.rs-2621653/v1), 2023-03-02
Supplement: Supplementary file 4 [file b42f9a6c8cd007495c39a84d.docx]

Table 2. Results of confirmatory factor analysis for sample A

| **Items**  **Loadings (ρA) (ρC) (α) AVE CR** |
| --- |
| **Perceived Usefulness of Mobile Apps 0.96 0.97 0.95 0.91 0.97** |
| PUM1 0.937 |
| PUM2 0.969 |
| PUM3 0.964 |
|  |
| **Awareness of Green Marketing 0.90 0.88 0.83 0.66 0.88** |
| AGM1 - |
| AGM2 0.742 |
| AGM3 0.848 |
| AGM4 0.848 |
| AGM5 0.802 |
|  |
| **Green Competitive Advantage 0.86 0.91 0.86 0.71 0.90** |
| GCA1 0.803 |
| GCA2 0.867 |
| GCA3 0.871 |
| GCA4 0.829 |
|  |
| **Mobile Learning 0.92 0.93 0.91 0.74 0.93** |
| MLD1 0.894 |
| MLD2 0.921 |
| MLD3 0.855 |
| MLD4 0.803 |
| MLD5 0.816 |
|  |
| **Environmentally Responsible Underwater Behavior 0.89 0.92 0.89 0.65 0.92** |
| ERUB1 0.862 |
| ERUB2 0.763 |
| ERUB3 0.806 |
| ERUB4 0.848 |
| ERUB5 - |
| ERUB6 0.797 |
| ERUB7 0.778 |
| ERUB8- |
|  |
| **Sustainable Diving Tourism (ENV) 0.73 0.84 0.72 0.65 0.84** |
| SDT1 0.764 |
| SDT2 0.871 |
| SDT3 0.773 |
|  |
| **Sustainable Diving Tourism (EC) 0.91 0.93 0.90 0.68 0.93** |
| EC1 0.887 |
| EC2 0.931 |
| EC3 0.882 |
| EC4 0.748 |
| EC5- |
| EC6 0.725 |
| EC7 0.755 |
| EC8 - |
|  |
| **Sustainable Diving Tourism (SC) 0.91 0.92 0.90 0.67 0.92** |
| SC1 0.720 |
| SC2 0.809 |
| SC3 0.864 |
| SC4 0.871 |
| SC5 0.806 |
| SC6 0.839 |
| SC7 - |
|  |
| **Sustainable Diving Tourism (INST)** **0.82 0.87 0.80 0.63 0.87** |
| INST1 0.781 |
| INST2 0.801 |
| INST3 0.786 |
| INST4 0.802 |
