# Supplementary material for: Usefulness of mobile apps for achieving sustainable diving tourism
Source: Research Square preprint supplement (doi:10.21203/rs.3.rs-2621653/v1), 2023-03-02
Supplement: Supplementary file 5 [file ee375cd7cb1a38f01f078d83.docx]

Table 3. Results of confirmatory factor analysis for sample B

| **Items**  **Loadings (ρA) (ρC) (α) AVE CR** |
| --- |
| **Perceived Usefulness of Mobile Apps 0.96 0.97 0.96 0.92 0.97** |
| PUM1 0.924 |
| PUM2 0.977 |
| PUM3 0.973 |
|  |
| **Awareness of Green Marketing 0.91 0.92 0.89 0.75 0.92** |
| AGM1 - |
| AGM2 0.804 |
| AGM3 0.888 |
| AGM4 0.882 |
| AGM5 0.886 |
|  |
| **Green Competitive Advantage 0.87 0.91 0.86 0.71 0.91** |
| GCA1 0.782 |
| GCA2 0.857 |
| GCA3 0.887 |
| GCA4 0.847 |
|  |
| **Mobile Learning 0.92 0.94 0.92 0.77 0.94** |
| MLD1 0.896 |
| MLD2 0.925 |
| MLD3 0.863 |
| MLD4 0.880 |
| MLD5 0.807 |
|  |
| **Environmentally Responsible Underwater Behavior 0.88 0.91 0.88 0.63 0.91** |
| ERUB1 0.783 |
| ERUB2 0.810 |
| ERUB3 0.861 |
| ERUB4 0.821 |
| ERUB5 - |
| ERUB6 0.749 |
| ERUB7 0.709 |
| ERUB8 - |
| **Sustainable Diving Tourism (ENV) 0.82 0.88 0.81 0.72 0.89** |
| SDT1 0.867 |
| SDT2 0.912 |
| SDT3 0.766 |
|  |
| **Sustainable Diving Tourism (EC) 0.92 0.94 0.92 0.72 0.94** |
| EC1 0.875 |
| EC2 0.921 |
| EC3 0.890 |
| EC4 0.788 |
| EC5 - |
| EC6 0.803 |
| EC7 0.798 |
| EC8 - |
|  |
| **Sustainable Diving Tourism (SC) 0.90 0.92 0.89 0.62 0.92** |
| SC1 0.752 |
| SC2 0.811 |
| SC3 0.777 |
| SC4 0.839 |
| SC5 0.776 |
| SC6 0.798 |
| SC7 0.759 |
|  |
| **Sustainable Diving Tourism (INST)** **0.83 0.89 0.83 0.66 0.89** |
| INST1 0.747 |
| INST2 0.829 |
| INST3 0.858 |
| INST4 0.815 |
